# Supplementary material for: Effect of ZnO nanoparticle application on crop safety and soil environment: a case study of potato planting
Source: Royal Society of Chemistry journal article supplement (doi:10.1039/d3en00680h), 2023-12-18
Supplement: d3en00680h1.pdf [file d3en00680h1.pdf]

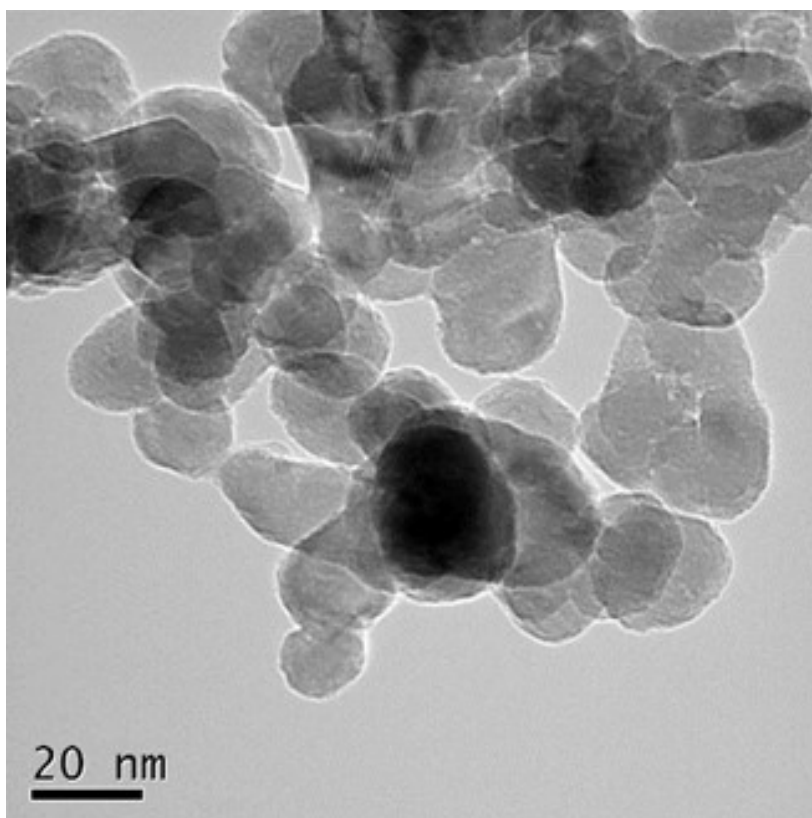

Fig. S.1. The TEM picture of ZnO NPs

Table S.1 Effects of Zn treatments on N, P, K, Cu, Fe, Mn concentration of potato tuber ( $\text{mg}\cdot\text{kg}^{-1}$ )

| Treatments | N      | P       | K       | Cu    | Fe      | Mn     |
|------------|--------|---------|---------|-------|---------|--------|
| CK         | 11.00a | 22.18bc | 22.57ab | 6.49b | 16.56ab | 5.62ab |
| ZnO10      | 10.58a | 21.82bc | 20.25b  | 7.50b | 19.55a  | 6.44a  |
| ZnO50      | 11.58a | 23.95bc | 22.18a  | 9.00a | 15.99ab | 5.92ab |
| ZnO200     | 11.85a | 28.55a  | 22.99a  | 9.49a | 13.12b  | 5.07b  |
| ZnO500     | 12.22a | 24.66b  | 22.97ab | 8.75a | 12.82b  | 5.25b  |
| ZnO800     | 12.90a | 21.37c  | 20.88ab | 7.50b | 16.34ab | 5.59ab |

Note: Different lower case letters indicate significant differences between treatments ( $p < 0.05$ ).

Table S.2 The BCFs and translocation factor of each tissue of potato under different Zn treatments

| Treatment | BCFs | TF <sub>root - stem</sub> | TF <sub>stem - leaves</sub> | TF <sub>root - tuber</sub> | TF <sub>underground - above ground</sub> |
|-----------|------|---------------------------|-----------------------------|----------------------------|------------------------------------------|
| CK        | 1.02 | 0.87                      | 0.63                        | 0.27                       | 1.21                                     |
| ZnO10     | 0.85 | 1.56                      | 0.28                        | 0.24                       | 1.76                                     |
| ZnO50     | 0.58 | 3.08                      | 0.18                        | 0.26                       | 3.14                                     |
| ZnO200    | 0.89 | 2.64                      | 0.13                        | 0.14                       | 2.63                                     |
| ZnO500    | 0.68 | 1.96                      | 0.10                        | 0.08                       | 2.07                                     |
| ZnO800    | 1.03 | 1.14                      | 0.17                        | 0.06                       | 1.50                                     |
